# Supplementary material
Source: PubMed Central journal article supplement (PMC6638363)
Supplement: MPP-17-1344-s005.pdf [file MPP-17-1344-s005.pdf]

**Table S1. Oligonucleotides used in this study**

| <b>Oligonucleotide</b> | <b>Sequence</b>                   | <b>Use</b>       |
|------------------------|-----------------------------------|------------------|
| AR1 LB                 | ATCAGGATCCACTGCGCTGCAGATCAACG     | AR1 expression   |
| AR1 RH                 | ATACAAGCTTTTAGGTAGCCGTCAGCTCAACA  | AR1 expression   |
| AR2 LB                 | ATCAGGATCCAGTGTTCATTGAGCAGCCA     | AR2 expression   |
| AR2 RH                 | ATACAAGCTTTTAGACCAGCAATGCATCCTTG  | AR2 expression   |
| AR3 LB                 | ATCAGGATCCGGCCAGTTGGACAATCATCA    | AR3 expression   |
| AR3 RH                 | ATACAAGCTTTTAGATCTGCGTCAGCGAGGTC  | AR4 expression   |
| AR3-1 LB               | ATCAGGATCCGCAGGCGGCGGTTTGC        | AR3-1 expression |
| AR3-1 RH               | ATACAAGCTTTTAGCGCTGCAGCAGGAAGCT   | AR3-1 expression |
| AR3-2 RH               | ATACAAGCTTTTAGTTGAGACGGGTATCGTTG  | AR3-2 expression |
| AR3-3 LB               | ATCAGGATCCCGTGTCTGTTAACACAACCAGCG | AR3-3 expression |
| CsACT-L                | GAGCTGAAAGATTCCGTTGC              | RT-qPCR          |
| CsACT-R                | TTGATCTTCATGCTGCTTGG              | RT-qPCR          |
| CsHIR-L                | GTATTTGGCAGGCCTTGGTA              | RT-qPCR          |
| CsHIR-R                | TTTGAGGAGGCACCAATTC               | RT-qPCR          |
| CsPR1-L                | AAAGTTGTTCAAACCTTTTTGTCCTT        | RT-qPCR          |
| CsPR1-R                | ACATGATCAATAGTAGGGATGTTAGC        | RT-qPCR          |
| CsPR3-L                | ACGGTCTAACCACAAATATAATCAAC        | RT-qPCR          |
| CsPR3-R                | ATAAGAGCGTAACAGTTTAGTTGTCC        | RT-qPCR          |
| CsPR4-L                | GTGTGATTCTGTCACCTTTGTCTACTG       | RT-qPCR          |
| CsPR4-R                | ACTGTTTGTGACCCTTAAGCAC            | RT-qPCR          |
| CsLOX2-L               | GCCTTAAAACAATGGGTTACTAATA         | RT-qPCR          |
| CsLOX2-R               | GTATAAATATTGCCCAAAGTTCACAG        | RT-qPCR          |
| CsPrxA-L               | AGCCGCTCTCATTTCTCTA               | RT-qPCR          |
| CsPrxA-R               | TTGATCGAAAACAGCCTCTG              | RT-qPCR          |
| CsMKK4-L               | GGCACCTCGATACTTTGTT               | RT-qPCR          |
| CsMKK4-R               | TAATTCCTCCGTAGGCATC               | RT-qPCR          |
| CsGST-L                | AACCTACTTGAAACACACTAGAAGA         | RT-qPCR          |
| CsGST-R                | GTTTCATCAGATATCTTAAGGCTGGTA       | RT-qPCR          |
| CsMAPK3-L              | TTACATGATGAAGCCGATGAAC            | RT-qPCR          |
| CsMAPK3-R              | TGAGTGCTAATGCCTCCTGATA            | RT-qPCR          |
| CsWRKY30-L             | CGAAAGAAGCAAATGGGGTA              | RT-qPCR          |
| CsWRKY30-R             | GGAAATAAACGTGGCGAAAA              | RT-qPCR          |
| CsRbohB-L              | AAAGCCAGATAGATTCAGATACAAGA        | RT-qPCR          |
| CsRbohB-R              | TCTAGGAAAATCAGGATTGTTATGTC        | RT-qPCR          |
| SIGras2 F              | ATGTGAGGGCATGGAAAGAG              | RT-qPCR          |
| SIGras2 R              | TCCATCCAACAACATAGCTC              | RT-qPCR          |
| SIPti5 F               | GCTAGACATGGTGCAGAGGT              | RT-qPCR          |
| SIPti5 R               | TCTACTGAAACAGAGGCGTTC             | RT-qPCR          |
| SIRpl2-L               | CGTGGTGTGCTATGAATCC               | RT-qPCR          |
| SIRpl2-R               | GTCAGCTTTGGCAGCAGTAG              | RT-qPCR          |
| SIMKK4-L               | TGATCCAGACACTTATGGAGGTAA          | RT-qPCR          |
| SIMKK4-R               | AGCATATAGCGCACATCAGAGTAG          | RT-qPCR          |
| SIWRKY28-L             | ACAGATGCAGCTACCTCATCCTCA          | RT-qPCR          |
| SIWRKY28-R             | GTGCTCAAAGCCTCATGGTTCTTG          | RT-qPCR          |
| SIMAPK3-L              | TCCATTAGCCATTGATCTTGTA            | RT-qPCR          |
| SIMAPK3-R              | ATCTGCTCTTCTCTATCCCTTGT           | RT-qPCR          |
| SIHIR-L                | GTGCAACAATTGGATGTTTCG             | RT-qPCR          |
| SIHIR-R                | CAGCCTTGCAATTCATTT                | RT-qPCR          |
